# Supplementary material
Source: ML conference proceedings conference paper supplement (https://proceedings.neurips.cc/paper_files/paper/2016/hash/140f6969d5213fd0ece03148e62e461e-Abstract.html)
Supplement: Supplementary file [file 140f6969d5213fd0ece03148e62e461e-Supplemental.zip]

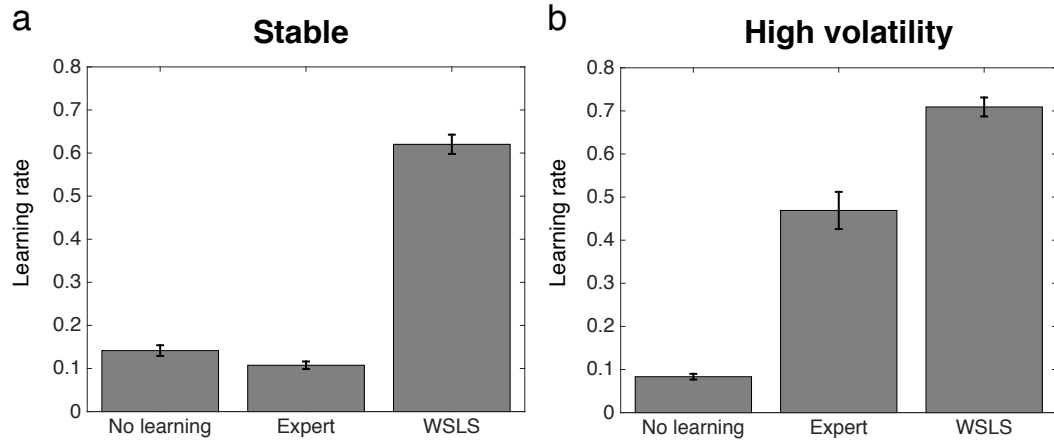

S1. R-W simulation. Estimated learning rate of three behavioral types in stable and high volatility condition.

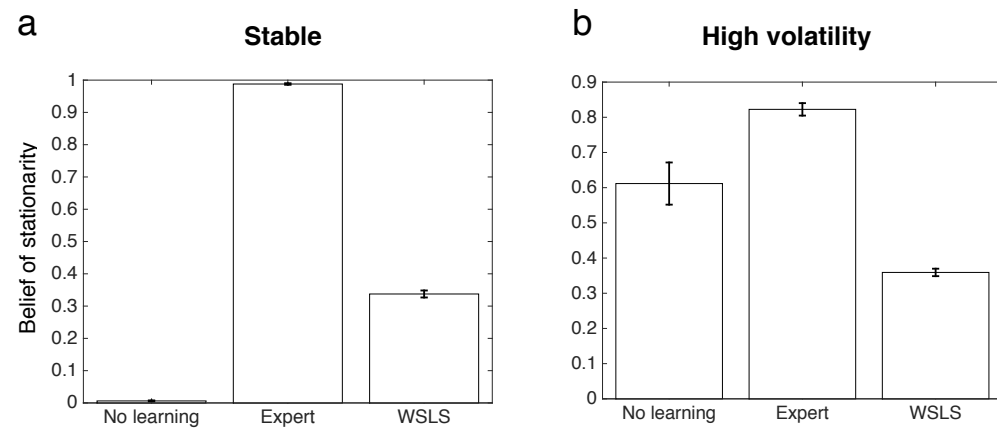

S2. DBM simulation. Estimated alpha of three behavioral types in stable and high volatility condition.

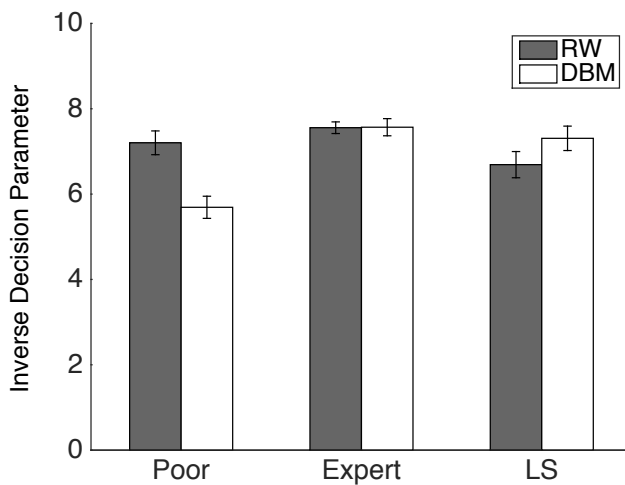

S3. Comparison of inverse decision parameter between R-W and DBM (low volatility condition).
